# Supplementary material for: pH-responsive polyelectrolyte complexation on upconversion nanoparticles: a multifunctional nanocarrier for protection, delivery, and 3D-imaging of therapeutic protein
Source: Royal Society of Chemistry journal article supplement (doi:10.1039/d2tb00246a), 2022-01-01
Supplement: d2tb00246a21.pdf [file d2tb00246a21.pdf]

## Supporting Information

### **pH-Responsive Polyelectrolyte Complexation on Upconversion Nanoparticles: A Multifunctional Nanocarrier for Protection, Delivery, and 3D-Imaging of Therapeutic Protein**

Ranjit De<sup>a,b</sup>, Yo Han Song<sup>a</sup>, Manoj Kumar Mahata<sup>a,c</sup>, Kang Taek Lee<sup>a,\*</sup>

<sup>a</sup> *Department of Chemistry, Gwangju Institute of Science and Technology (GIST), Gwangju, 61005, South Korea*

<sup>b</sup> *Laboratory of Molecular Neurophysiology, Department of Life Sciences, Pohang University of Science and Technology (POSTECH), Pohang, 37673, South Korea*

<sup>c</sup> *Faculty of Physics, Georg-August-Universität Göttingen, Friedrich-Hund-Platz 1, 37077, Göttingen, Germany*

\*Corresponding Author. E-mail: klee@gist.ac.kr (K. T. Lee)

#### **INDEX**

1. Energy-Dispersive X-ray Spectroscopy
2. Estimation of the Concentration of BSA Loaded on UCNP functionalized by poly-D-lysine (ULB) and poly-acrylic acid (UAB) *via* UV-vis Spectroscopy
3. Investigation of the Internalization Process of BSA loaded functionalized UCNPs and the release of BSA in HeLa Cells *via* 2D live-cell imaging.
4. Investigation of the Internalization Process of BSA loaded functionalized UCNPs and the release of BSA in HeLa Cells *via* 3D live-cell imaging (Movie captions).
5. References

## 1. Energy-Dispersive X-ray Spectroscopy

**Table S1.** Distribution of lanthanide ions in the core-shell nanoparticles determined by energy-dispersive X-ray spectroscopy.

| Y (wt%) | Yb (wt%) | Er (wt%) |
|---------|----------|----------|
| 90.01   | 9.16     | 0.92     |

## 2. Estimation of the Concentration of BSA Loaded on UCNP functionalized by poly-D-lysine (ULB) and poly-acrylic acid (UAB) *via* UV-vis Spectroscopy

**Equation obtained from Figure 4b**

$$Y = 0.012 + 0.004 X \quad \dots \quad (1)$$

**Amount of BSA in the Supernatant obtained from UAB sample,**

$$\begin{aligned} X &= (Y - 0.012) / 0.004 \\ &= (0.17159 - 0.012) / 0.004 \\ &= 39.8 \end{aligned}$$

**Amount of BSA in the Supernatant obtained from ULB sample,**

$$\begin{aligned} X &= (Y - 0.012) / 0.004 \\ &= (0.12284 - 0.012) / 0.004 \\ &= 27.7 \end{aligned}$$

**Result:**

Amount of loaded BSA in UAB =  $(100 - 39.8) \mu\text{M} = 60.2 \mu\text{M}$  (~60%)

Amount of loaded BSA in ULB =  $(100 - 27.7) \mu\text{M} = 72.3 \mu\text{M}$  (~72%)

### 3. Investigation of the Internalization Process of BSA loaded functionalized UCNPs and the release of BSA in HeLa Cells *via* live-cell imaging

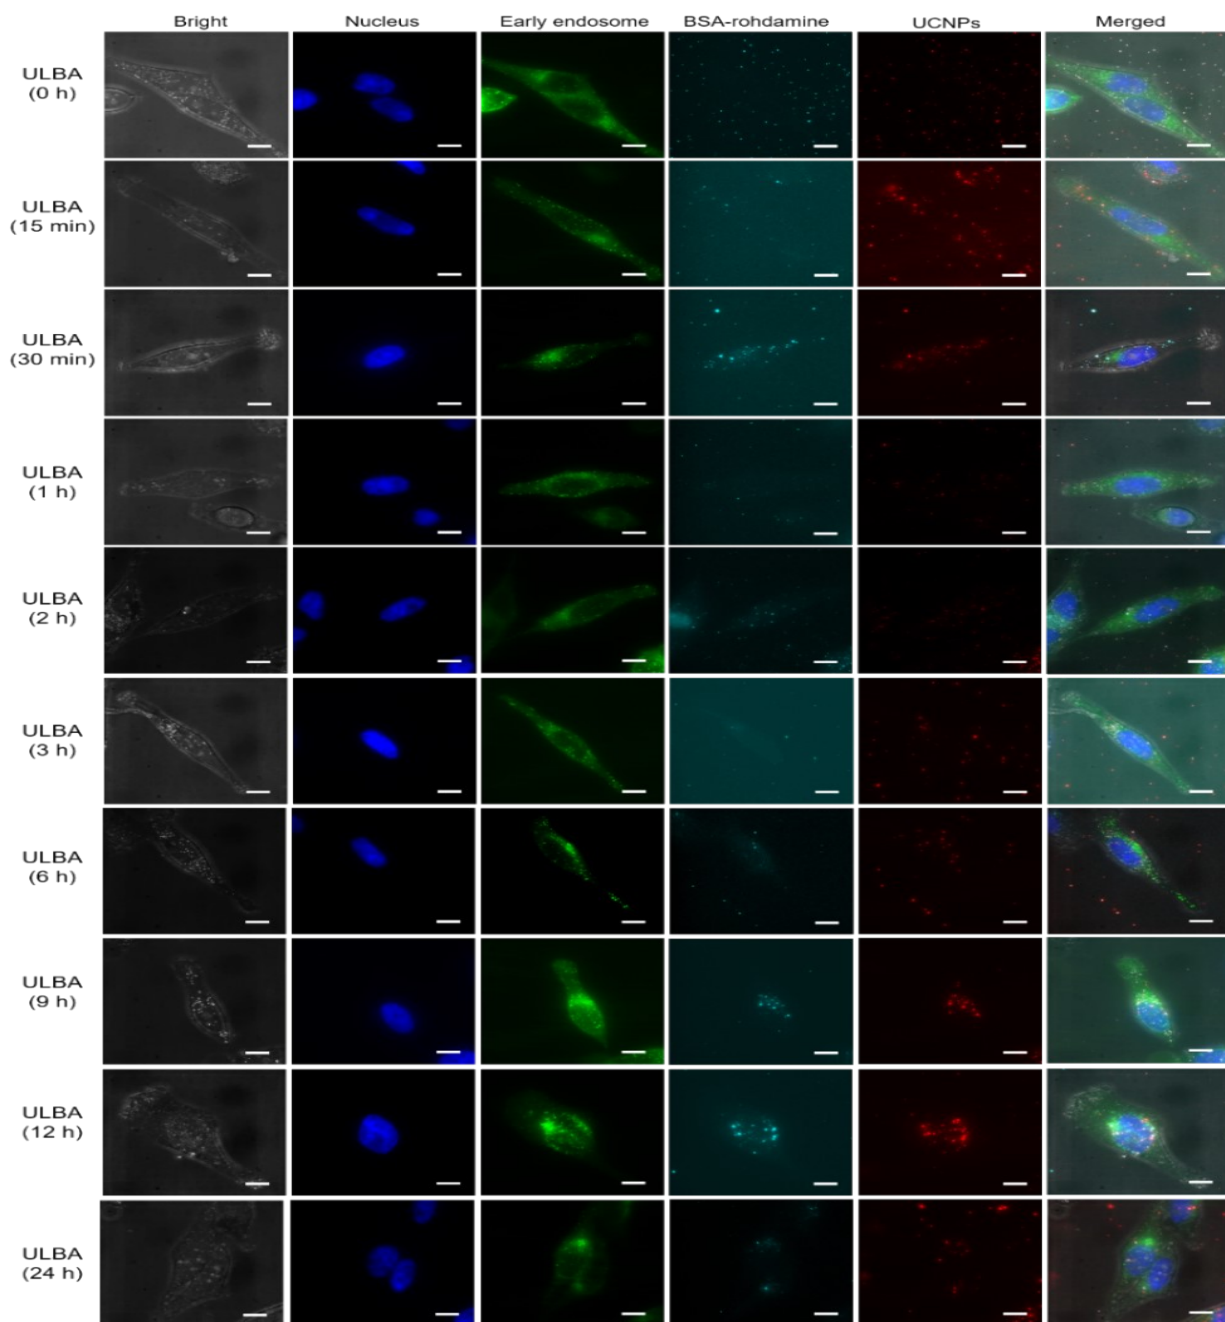

**Figure S1.** Results of 2D imaging for co-localization test of UCNP@Polylysine@BSA@Polyacrylic acid (ULBA) with early endosome stained HeLa cells. Cell (grey), nucleus (blue), early endosome (green), BSA-rhodamine (cyan), UCNPs (red) and merged images at each time point. Scale bar = 10  $\mu$ m

#### 4. Investigation of the Internalization Process of BSA loaded functionalized UCNPs and the release of BSA in HeLa Cells *via* 3D live-cell imaging

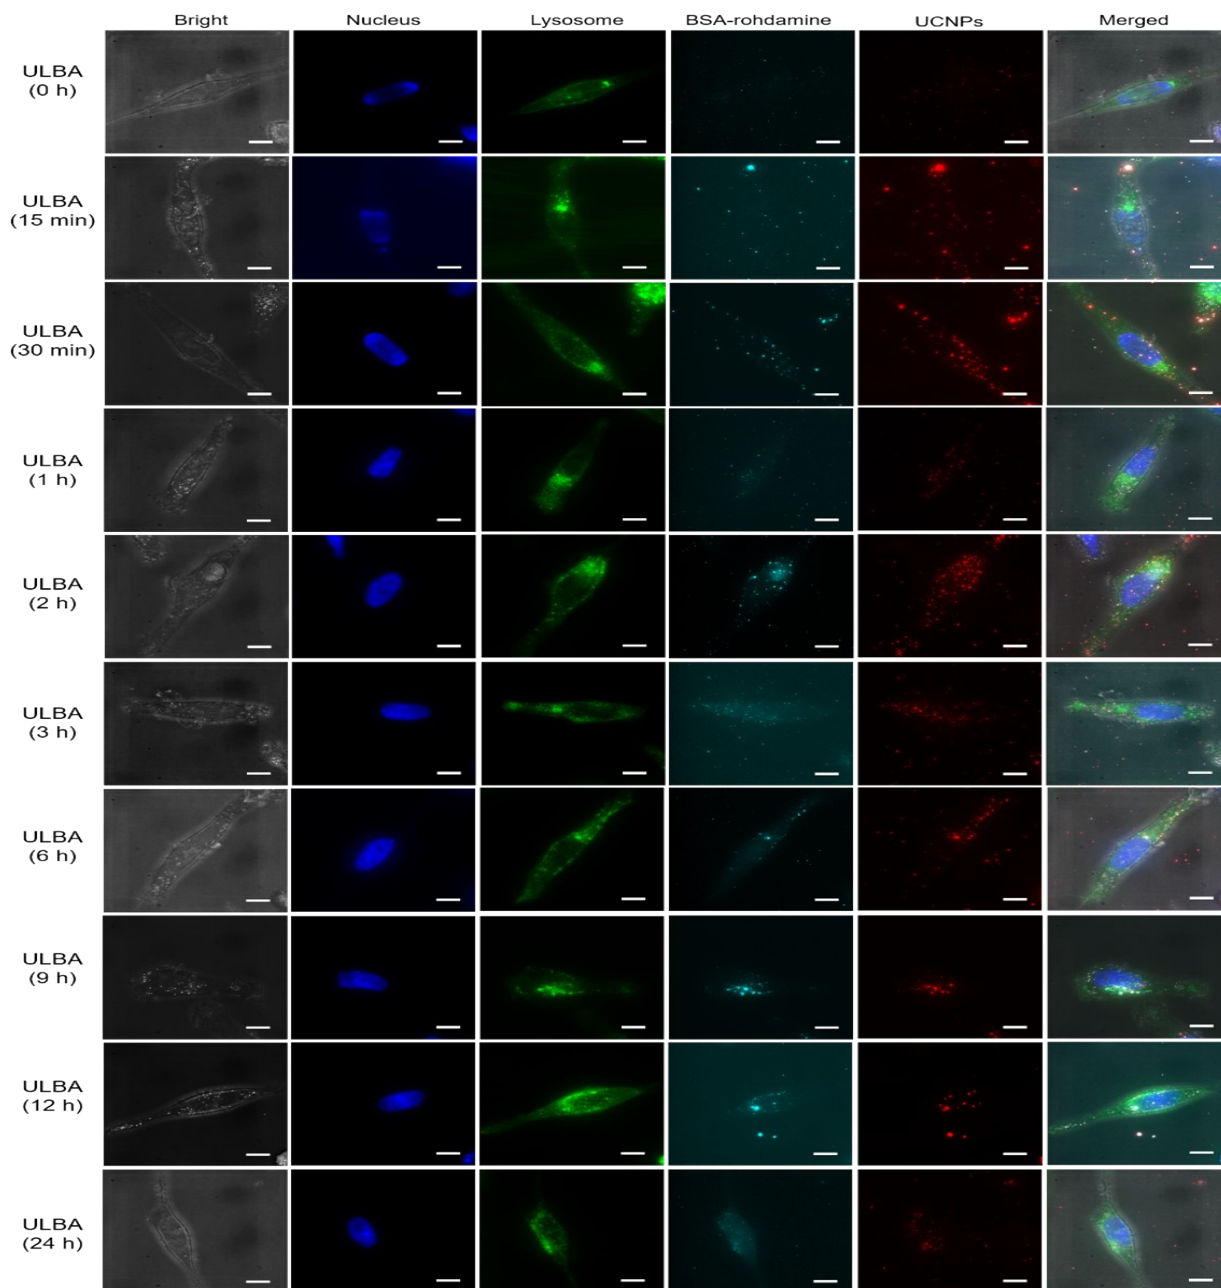

**Figure S2.** Results of 2D imaging for co-localization test with lysosome stained HeLa cells. cell (grey), nucleus (blue), lysosome (green), BSA-rhodamine (cyan), UCNPs (red) and merged images at each time point. Scale bar = 10  $\mu$ m

Note: The movie captions are listed below, and the movie files are uploaded separately.

## List of Movie Captions

**Movie S1.** Early endosome at 0 h post internalization of ULBA. Color code: Green: Early endosome; Cyan: BSA-Rhodamine; Red: UCNPs; Blue: Nucleus. (To watch video, click at the 'play' icon which gets popped on bringing the cursor on image).

**Movie S2.** Early endosome at 15 min post internalization of ULBA. Color code: Green: Early endosome; Cyan: BSA-Rhodamine; Red: UCNPs; Blue: Nucleus. (To watch video, click at the 'play' icon which gets popped up on bringing the cursor on image).

**Movie S3.** Early endosome at 30 min post internalization of ULBA. Color code: Green: Early endosome; Cyan: BSA-Rhodamine; Red: UCNPs; Blue: Nucleus. (To watch video, click at the 'play' icon which gets popped up on bringing the cursor on image).

**Movie S4.** Early endosome at 1 h post internalization of ULBA. Color code: Green: Early endosome; Cyan: BSA-Rhodamine; Red: UCNPs; Blue: Nucleus. (To watch video, click at the 'play' icon which gets popped up on bringing the cursor on image).

**Movie S5.** Early endosome at 2 h post internalization of ULBA. Color code: Green: Early endosome; Cyan: BSA-Rhodamine; Red: UCNPs; Blue: Nucleus. (To watch video, click at the 'play' icon which gets popped up on bringing the cursor on image).

**Movie S6.** Early endosome at 3 h post internalization of ULBA. Color code: Green: Early endosome; Cyan: BSA-Rhodamine; Red: UCNPs; Blue: Nucleus. (To watch video, click at the 'play' icon which gets popped up on bringing the cursor on image).

**Movie S7.** Early endosome at 6 h post internalization of ULBA. Color code: Green: Early endosome; Cyan: BSA-Rhodamine; Red: UCNPs; Blue: Nucleus. (To watch video, click at the 'play' icon which gets popped up on bringing the cursor on image).

**Movie S8.** Early endosome at 9 h post internalization of ULBA. Color code: Green: Early endosome; Cyan: BSA-Rhodamine; Red: UCNPs; Blue: Nucleus. (To watch video, click at the 'play' icon which gets popped up on bringing the cursor on image).

**Movie S9.** Early endosome at 12 h post internalization of ULBA. Color code: Green: Early endosome; Cyan: BSA-Rhodamine; Red: UCNPs; Blue: Nucleus. (To watch video, click at the ‘play’ icon which gets popped up on bringing the cursor on image).

**Movie S10.** Early endosome at 24 h post internalization of ULBA. Color code: Green: Early endosome; Cyan: BSA-Rhodamine; Red: UCNPs; Blue: Nucleus. (To watch video, click at the ‘play’ icon which gets popped up on bringing the cursor on image).

**Movie S11.** Lysosome at 0 h post internalization of ULBA. Color code: Green: Early endosome; Cyan: BSA-Rhodamine; Red: UCNPs; Blue: Nucleus. (To watch video, click at the ‘play’ icon which gets popped up on bringing the cursor on image).

**Movie S12.** Lysosome at 15 min post internalization of ULBA. Color code: Green: Early endosome; Cyan: BSA-Rhodamine; Red: UCNPs; Blue: Nucleus. (To watch video, click at the ‘play’ icon which gets popped up on bringing the cursor on image).

**Movie S13.** Lysosome at 30 min post internalization of ULBA. Color code: Green: Early endosome; Cyan: BSA-Rhodamine; Red: UCNPs; Blue: Nucleus. (To watch video, click at the ‘play’ icon which gets popped up on bringing the cursor on image).

**Movie S14.** Lysosome at 1 h post internalization of ULBA. Color code: Green: Early endosome; Cyan: BSA-Rhodamine; Red: UCNPs; Blue: Nucleus. (To watch video, click at the ‘play’ icon which gets popped up on bringing the cursor on image).

**Movie S15.** Lysosome at 2 h post internalization. Color code: Green: Early endosome; Cyan: BSA-Rhodamine; Red: UCNPs; Blue: Nucleus. (To watch video, click at the ‘play’ icon which gets popped up on bringing the cursor on image).

**Movie S16.** Lysosome at 3 h post internalization of ULBA. Color code: Green: Early endosome; Cyan: BSA-Rhodamine; Red: UCNPs; Blue: Nucleus. (To watch video, click at the ‘play’ icon which gets popped up on bringing the cursor on image).

**Movie S17.** Lysosome at 6 h post internalization of ULBA. Color code: Green: Early endosome; Cyan: BSA-Rhodamine; Red: UCNPs; Blue: Nucleus. (To watch video, click at the ‘play’ icon which gets popped up on bringing the cursor on image).

**Movie S18.** Lysosome at 6 h post internalization of ULBA. Color code: Green: Early endosome; Cyan: BSA-Rhodamine; Red: UCNPs; Blue: Nucleus. (To watch video, click at the ‘play’ icon which gets popped up on bringing the cursor on image).

**Movie S19.** Lysosome at 12 h post internalization of ULBA. Color code: Green: Early endosome; Cyan: BSA-Rhodamine; Red: UCNPs; Blue: Nucleus. (To watch video, click at the ‘play’ icon which gets popped up on bringing the cursor on image).

**Movie S20.** Lysosome at 24 h post internalization of ULBA. Color code: Green: Early endosome; Cyan: BSA-Rhodamine; Red: UCNPs; Blue: Nucleus. (To watch video, click at the ‘play’ icon which gets popped up on bringing the cursor on image).

## References

- [1] S.F. Himmelstoß, T. Hirsch, Long-Term Colloidal and Chemical Stability in Aqueous Media of NaYF<sub>4</sub>-Type Upconversion Nanoparticles Modified by Ligand-Exchange, Part. Part. Syst. Charact. 36 (2019) 1900235. <https://doi.org/10.1002/ppsc.201900235>.
- [2] N. Bogdan, F. Vetrone, R. Roy, J.A. Capobianco, Carbohydrate-coated lanthanide-doped upconverting nanoparticles for lectin recognition, J. Mater. Chem. 20 (2010) 7543–7550. <https://doi.org/10.1039/c0jm01617a>.
- [3] B. Liu, Y. Chen, C. Li, F. He, Z. Hou, S. Huang, H. Zhu, X. Chen, J. Lin, Poly(Acrylic Acid) Modification of Nd<sup>3+</sup>-Sensitized Upconversion Nanophosphors for Highly Efficient UCL Imaging and pH-Responsive Drug Delivery, Adv. Funct. Mater. 25 (2015) 4717–4729. <https://doi.org/10.1002/adfm.201501582>.
